# Supplementary material for: Investigation of Phosphorus Loaded V2O5/ZrO2 Catalysts for the Oxidative Dehydrogenation of Propane (ODH)
Source: MDPI journal article supplement (doi:10.3390/catal12080811), 2022-07-24
Supplement: s1 [file s1]

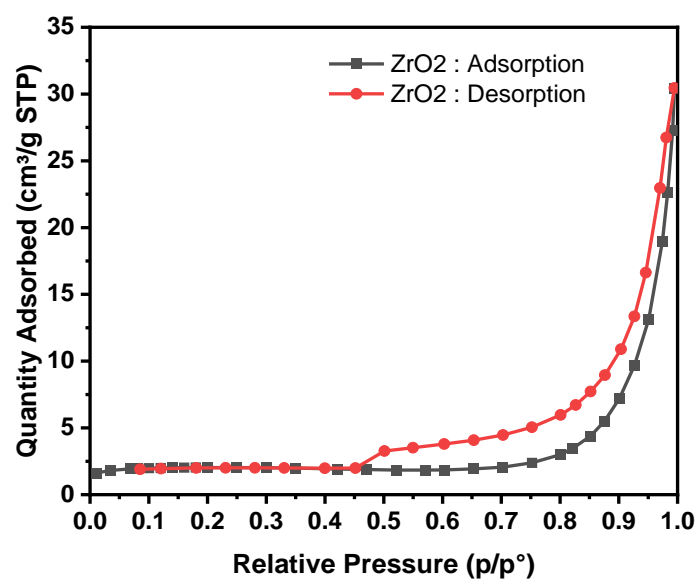

Figure S1 .  $N_2$  adsorption/desorption isotherms for  $ZrO_2$

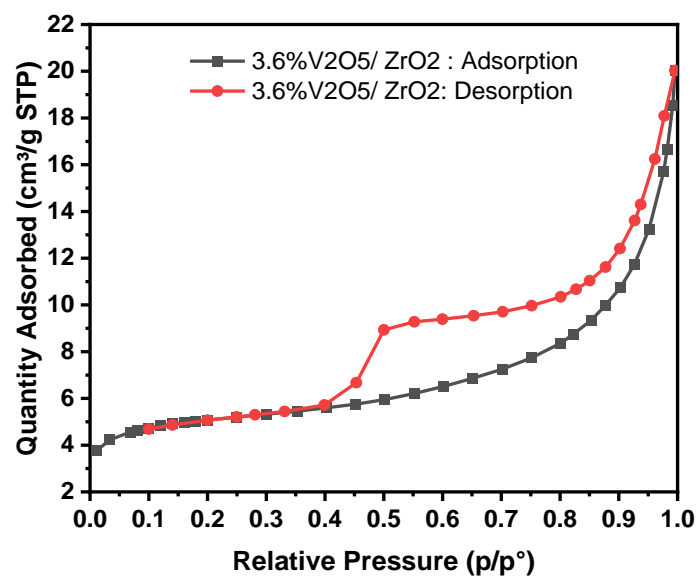

Figure S2.  $N_2$  adsorption/desorption isotherms for 3.6 wt%  $V_2O_5/ZrO_2$  powder

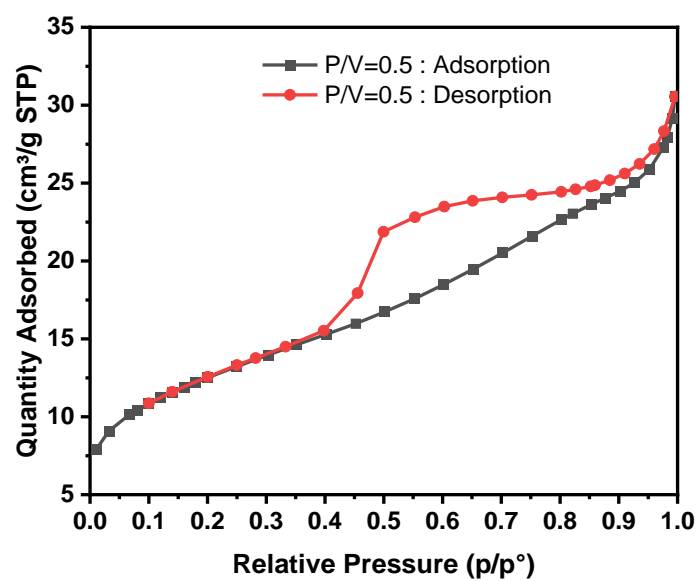

Figure S3 .  $N_2$  adsorption/desorption isotherms for P loaded 3.6 wt%  $V_2O_5/ZrO_2$  at  $P/V = 0.5$

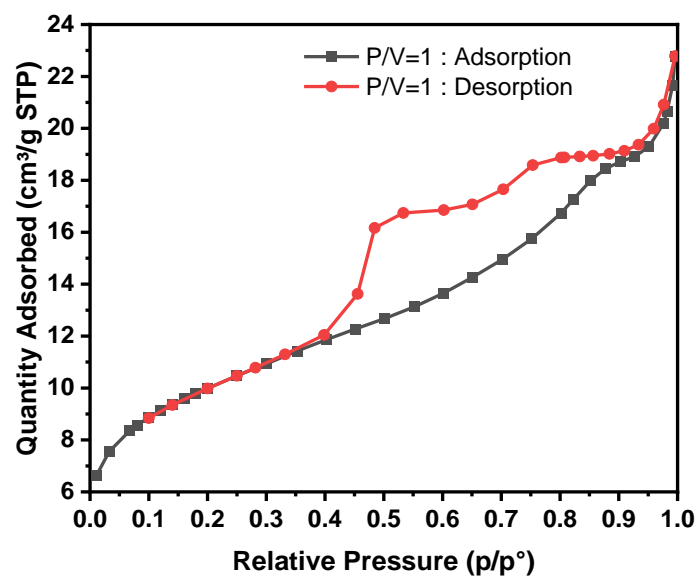

Figure S4.  $N_2$  adsorption/desorption isotherms for P loaded 3.6 wt%  $V_2O_5/ZrO_2$  at  $P/V = 1.0$

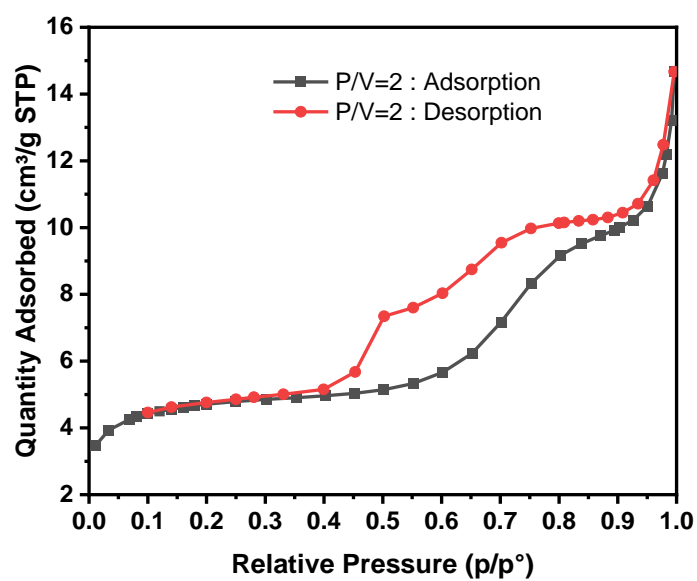

Figure S5.  $N_2$  adsorption/desorption isotherms for P loaded 3.6 wt%  $V_2O_5/ZrO_2$  at  $P/V = 2.0$

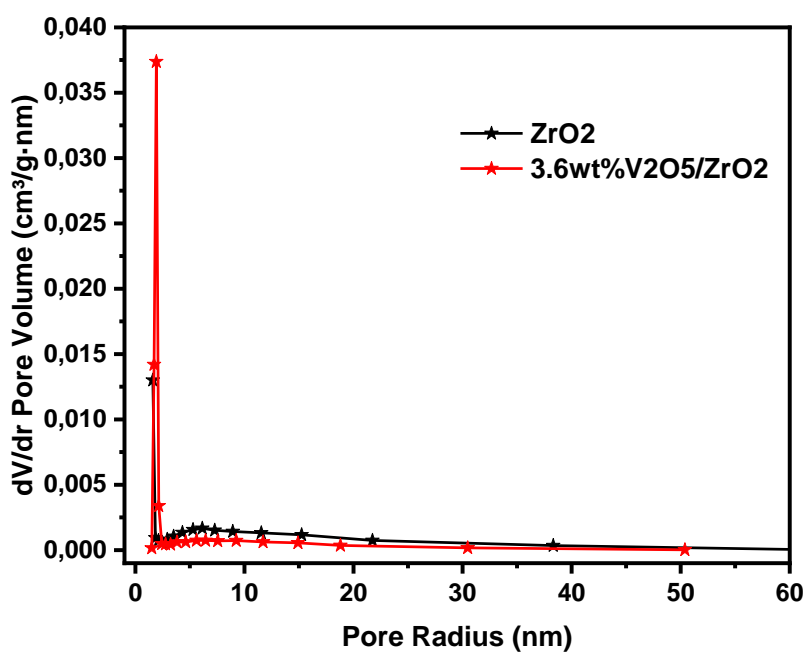

Figure S6. BJH Desorption  $dV/dw$  Pore volume ( $cm^3/g \cdot nm$ ) versus Pore width (nm) for  $ZrO_2$  and 3.6 wt%  $V_2O_5/ZrO_2$

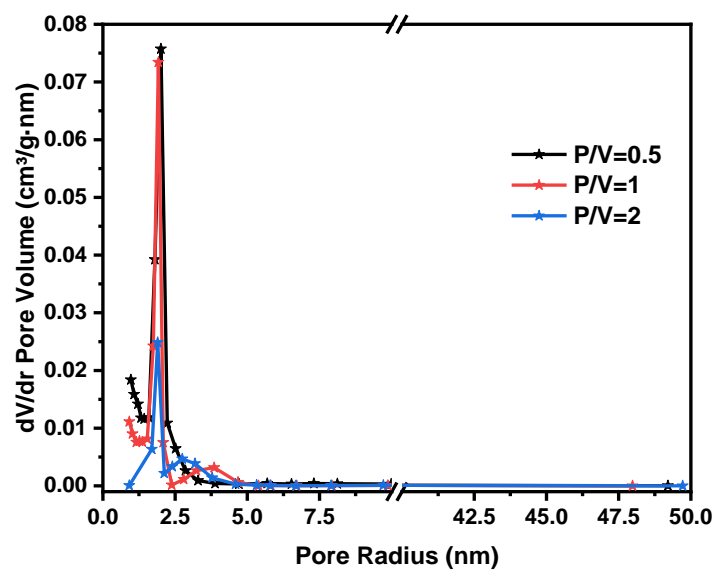

Figure S7. BJH Desorption  $dV/dw$  Pore volume ( $\text{cm}^3/\text{g}\cdot\text{nm}$ ) versus Pore width (nm) for P loaded 3.6 wt%  $\text{V}_2\text{O}_5/\text{ZrO}_2$  at different P/V ratio (0.5; 1.0 and 2.0).
